# Supplementary material for: Using Gene Editing to Establish a Safeguard System for Pluripotent Stem-Cell-Based Therapies
Source: PubMed Central journal article supplement — iScience. 2019 Nov 25;22:409–22. doi: 10.1016/j.isci.2019.11.038 (PMC6909005; doi:10.1016/j.isci.2019.11.038), 2019-11-25
Supplement: mmc1.pdf [file mmc1.pdf]

**ISCI, Volume 22**

**Supplemental Information**

**Using Gene Editing to Establish  
a Safeguard System for Pluripotent  
Stem-Cell-Based Therapies**

**Youjun Wu, Tammy Chang, Yan Long, He Huang, Fouad Kandeel, and Jiing-Kuan Yee**

## SUPPLEMENTAL INFORMATION

### SUPPLEMENTAL FIGURES

Figure S1

| NANOG                                 | Sequence                                                                                     | Identities |
|---------------------------------------|----------------------------------------------------------------------------------------------|------------|
| Chromosome 12<br>(7795053-7795135)    | ATTCC TAAACTACTCCATGAACATGCAACCTGAAGACGTG <b>TGA</b> AGATGAGTGAAACTGATATTACTCAATTCAGTCTGGACA | 100%       |
| Chromosome 12<br>(7898861-7898943)    | .....T.....G.....G.....                                                                      | 96%        |
| Chromosome 12<br>(7896574-7896656)    | .....T.....G.....                                                                            | 98%        |
| Chromosome 15<br>(35084153-35084235)  | .....                                                                                        | 100%       |
| Chromosome 9<br>(100176014-100176093) | .....T.....A.....G.....TA.....A.....                                                         | 93%        |
| <b>OCT4</b>                           |                                                                                              |            |
| Chromosome 6<br>(31164561-31164643)   | TGTCTCCGTCACCACTCTGGGCTCTCCCATGCATTCAAAC <b>TGA</b> GGTGCCTGCCCTTCTAGGAATGGGGGACAGGGGAGGGGA  | 100%       |
| Chromosome 12<br>(8133731-8133813)    | .....                                                                                        | 100%       |
| Chromosome 1<br>(155434221-155434302) | .....C.....                                                                                  | 99%        |
| Chromosome 8<br>(127416905-127416985) | .....T.....A.....-.....                                                                      | 96%        |
| Chromosome 10<br>(68010166-68010246)  | ...T...T...G.....AT.....A.....                                                               | 93%        |
| Chromosome 3<br>(128674629-128674706) | ...T...TG...-...-...C...G...A...G.....A...A.....                                             | 86%        |
| <b>SOX2</b>                           |                                                                                              |            |
| Chromosome 3<br>(181713272-181713354) | CGGCACGGCCATTAACGGGCACACTGCCCTCTCACACATG <b>TGA</b> GGGCCGGACAGCGAACTGGAGGGGGAGAAATTTCAAAG   | 100%       |
| Chromosome 8<br>(124301767-124301849) | ...C.....A.....G.....A.....G.....                                                            | 94%        |

**Figure S1. Chromosomal locations and sequences of the genetic loci that show sequence similarity to the *NANOG*, *OCT4*, and *SOX2* genes, related to Figure 1.** Genomic sequences spanning the stop codon of the *NANOG*, *OCT4*, and *SOX2* genes are shown. Stop codons of the three genes are boxed. Mismatched nucleotides in these genetic loci are marked by red and the percentage of sequence homology is on the right.

Figure S2

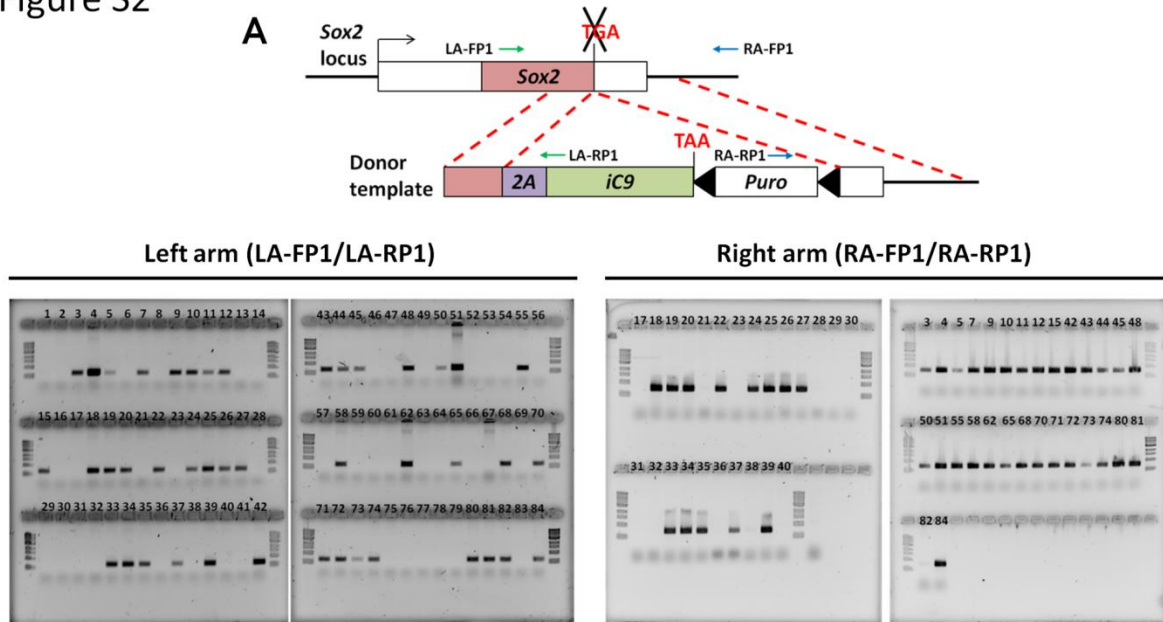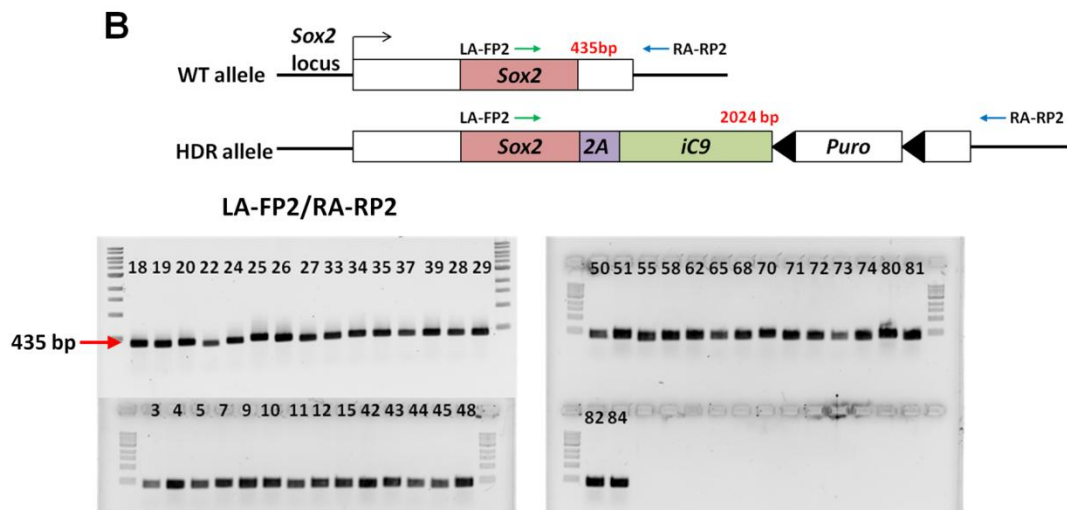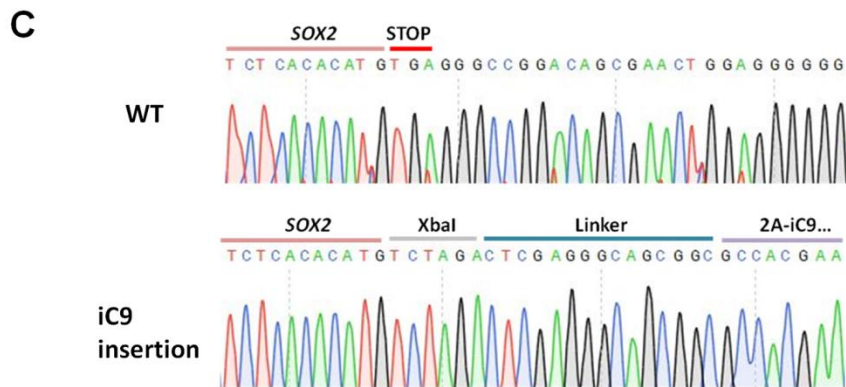

**Figure S2. Establishment of the H1-iC9-pur clone, related to Figure 1.** (A) Screening of H1 clones containing insertion of the *iC9* gene into the *SOX2* locus. Top: scheme for clone screening by genomic PCR. Two PCR primer pairs (green and blue arrows) and their sequences are listed in Table S2. Black arrowhead denotes the loxP site. Bottom: screening results from genomic PCR using the indicated primer pair. (B) Analysis of the positive clones identified in (A) for mono- and bi-allelic insertion of the *iC9* gene. Top: scheme for clone screening by genomic PCR. Primer pair used (green and blue arrows) and sequences are listed in Table S2. Bottom: screening results from genomic PCR using the indicated primer pair. Result indicates that all positive clones identified in (A) have a mono-allelic *iC9* gene insertion. (C) Sequence analysis of the two *SOX2* alleles near the stop codon of H1-iC9-pur cells.

Figure S3

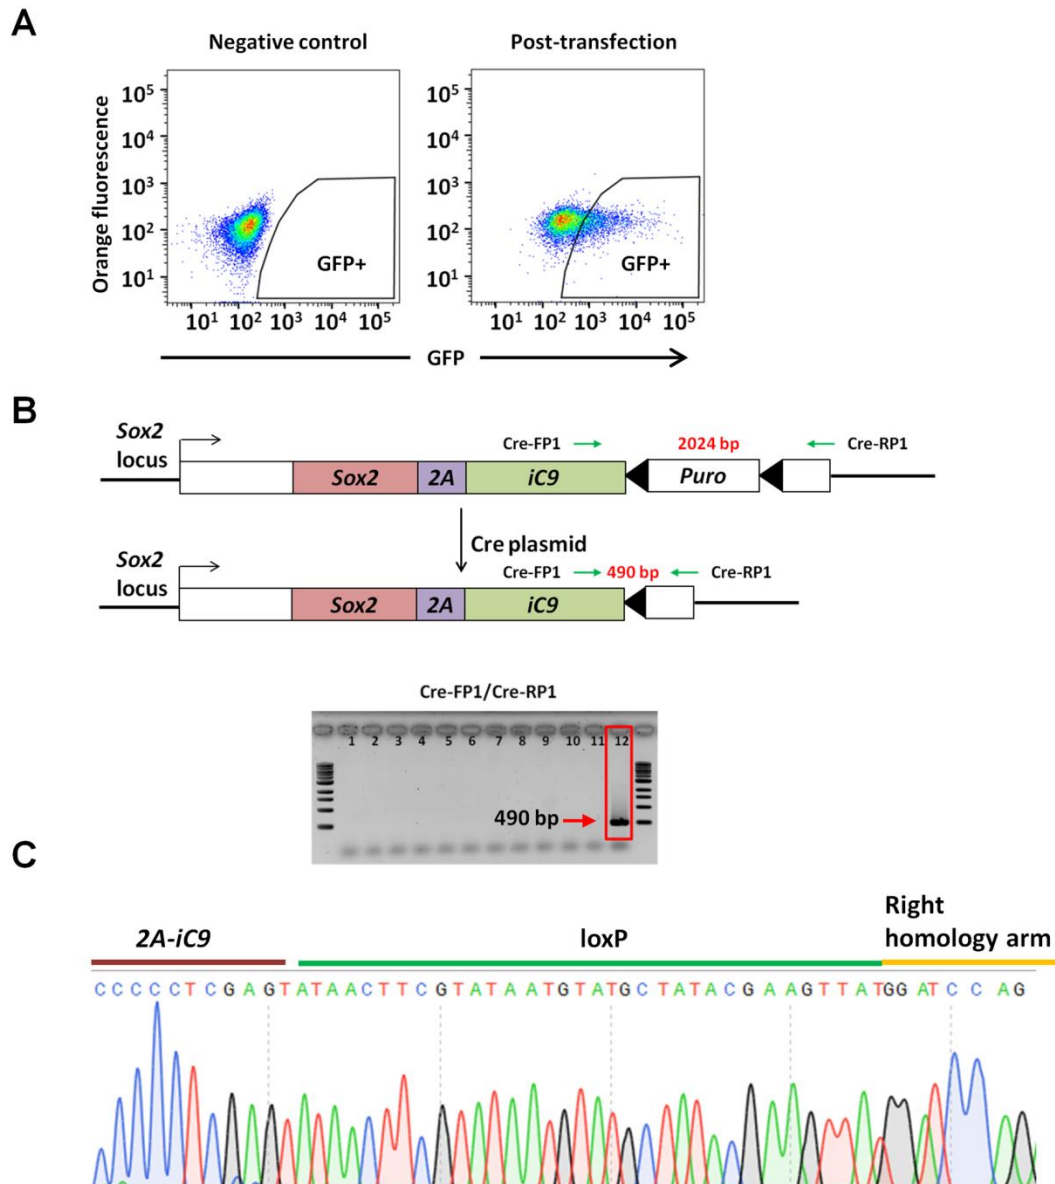

**Figure S3. Isolation of the H1-iC9 clones, related to Figure 1.** (A) Cell sorting of H1-iC9-pur cells co-transfected with pBS185 and pmaxGFP<sup>TM</sup>. GFP<sup>+</sup> cells were sorted 48 h after transfection and plated for clone isolation. (B) Isolation of the H1-iC9 clones. Top: scheme for genomic PCR screening to identify clones with the deletion of the puromycin-resistant gene. Positions of the PCR primers are indicated, and their sequences are listed in Table S2. Clones

without successful deletion of the puromycin-resistant gene are not expected to exhibit a PCR product due to the large fragment size. Bottom: A representative gel of genomic PCR result. The positive clone indicated by a red box had the expected deletion of the puromycin-resistant gene. (C) Sequence analysis of the allele containing the *iC9* gene in H1-iC9 cells confirmed deletion of the puromycin-resistant gene.

**Figure S4**

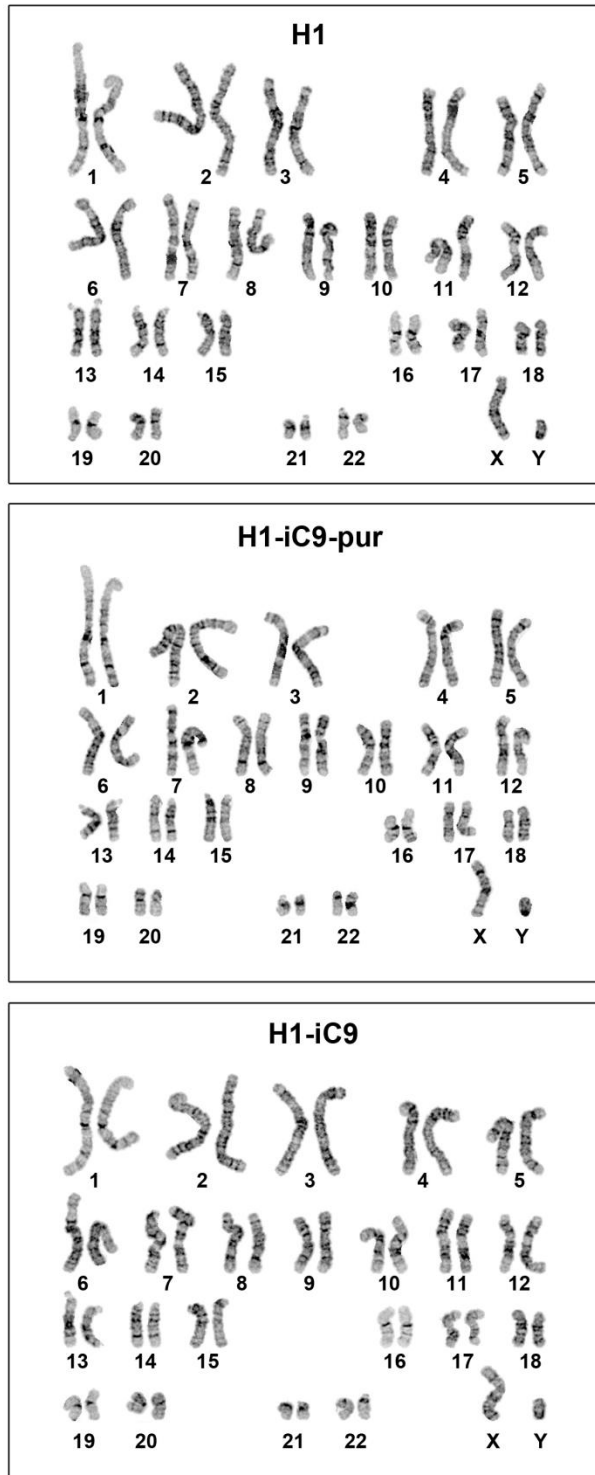

**Figure S4. Karyotype analysis of H1, H1-iC9-pur and H1-iC9 cell lines, related to Figure 1.**

## Figure S5

A

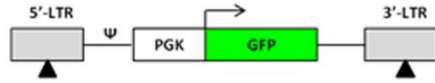

B

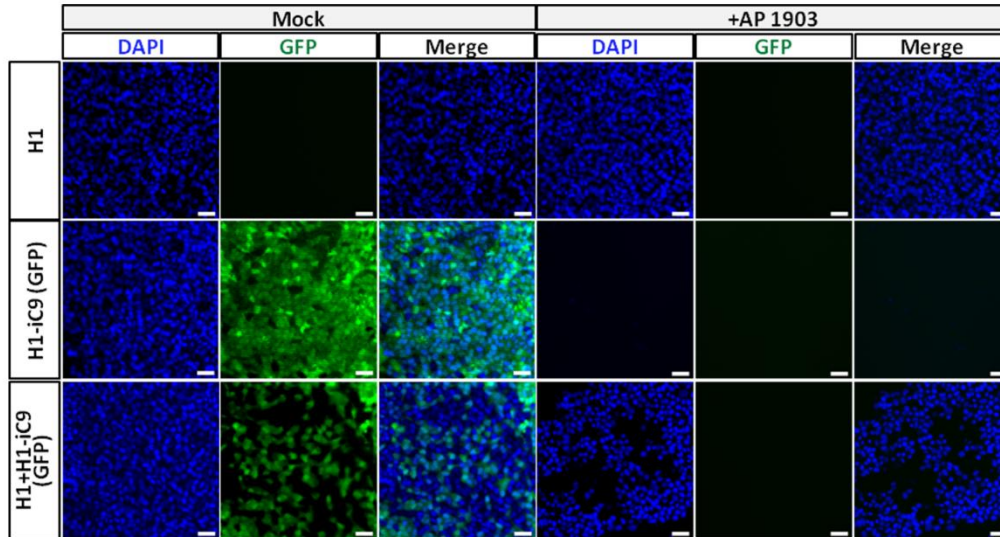

**Figure S5. Selective eradication of H1-iC9 cells by AP1903 *in vitro*, related to Figure 2.** (A) Marking of H1-iC9 cells with GFP. Structure of the lentiviral vector containing the *GFP* gene is shown. H1-iC9 cells were transduced with the GFP vector at a multiplicity of infection of 2, followed by cell sorting 48 h after transduction. GFP<sup>+</sup> cells were pooled and expanded. (B) H1 and H1-iC9(GFP) cells were either cultured alone or mixed in a 1:1 ratio. Each cell population was either mock treated or treated with 10 nM AP1903 overnight, and cell images were taken by fluorescence microscopy. The result indicates that AP1903 treatment selectively eradicates H1-iC9(GFP) cells in a mixed cell population containing both H1 and H1-iC9(GFP) cells. Scale bar = 50  $\mu$ m.



Figure S6

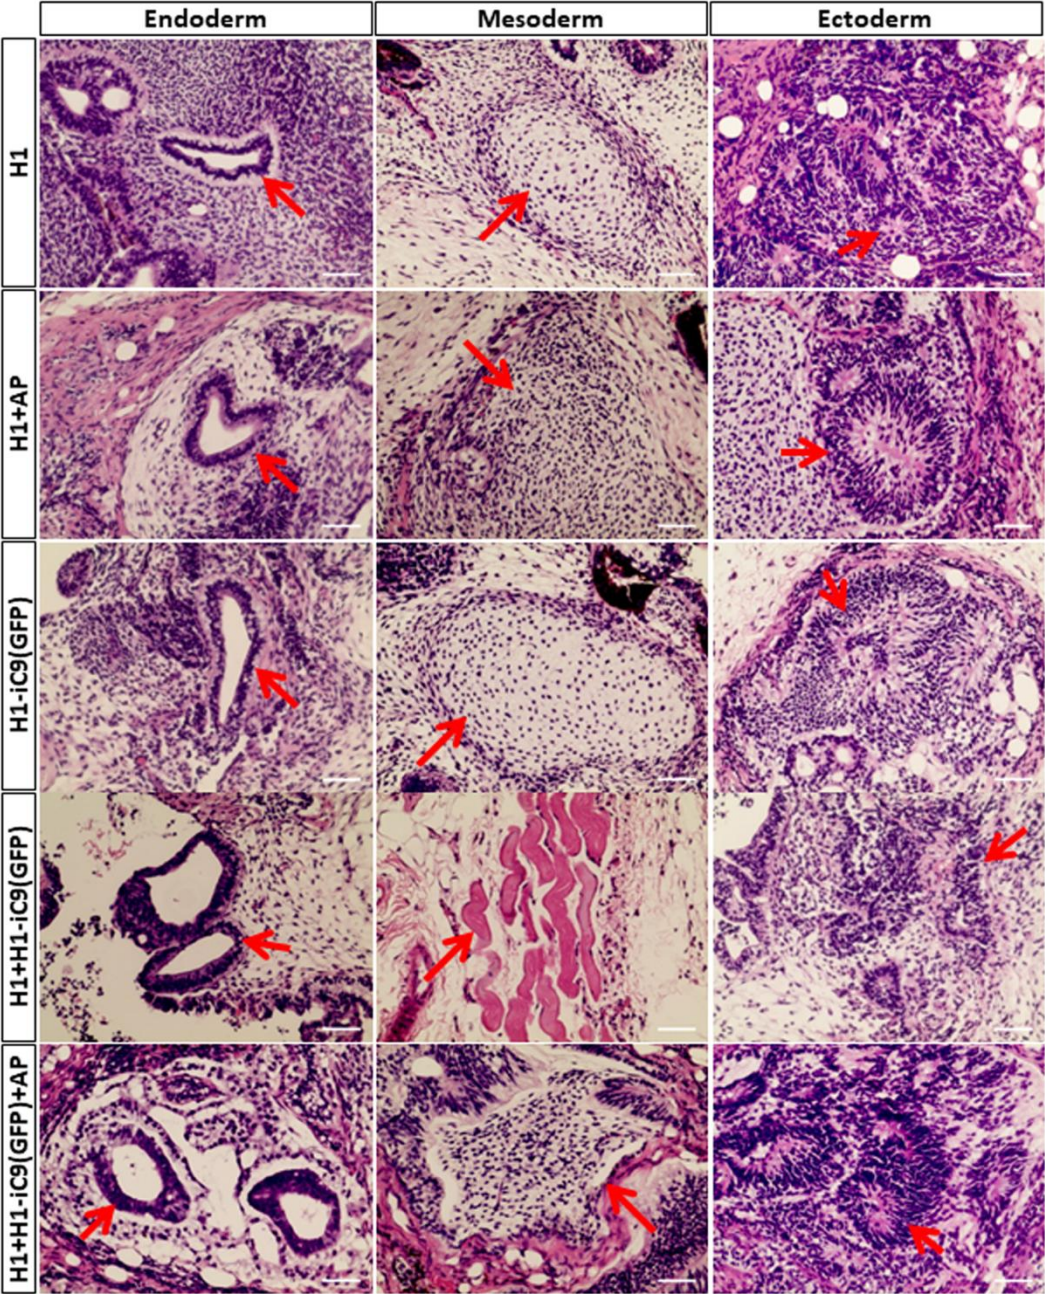

**Figure S6. Teratoma formation in NSG mice with H1-iC9(GFP) cells, related to Figure 2.** Representative H&E staining of teratoma sections derived from indicated cells exhibits all three germ layers (arrows). Scale bar = 50  $\mu$ m.

**Figure S7**

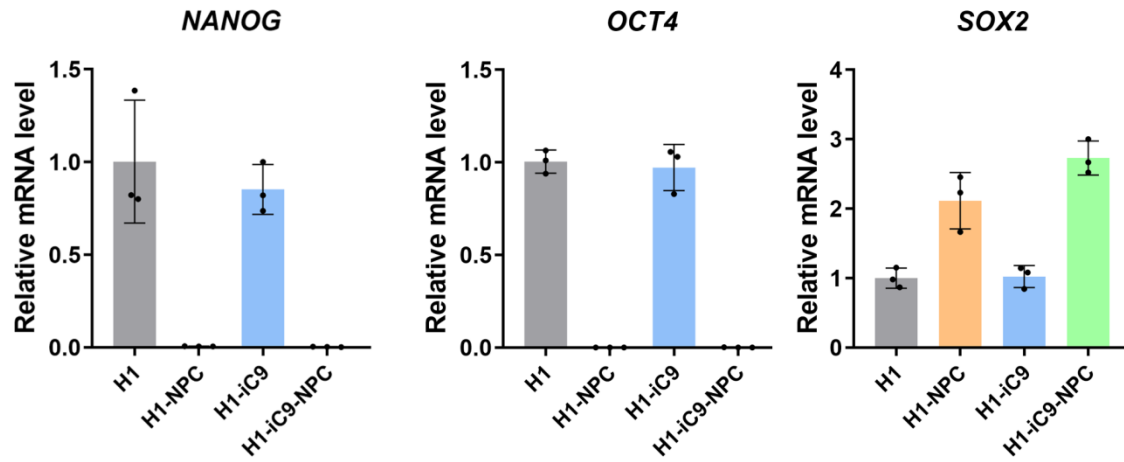

**Figure S7. Relative expression of NANOG, OCT4 and SOX2 in undifferentiated cells and NPCs quantified by qRT-PCR, related to Figure 4. Graphs present the mRNA level normalized to the control group (H1)  $\pm$  s.d. from three independent experiments.**

Figure S8

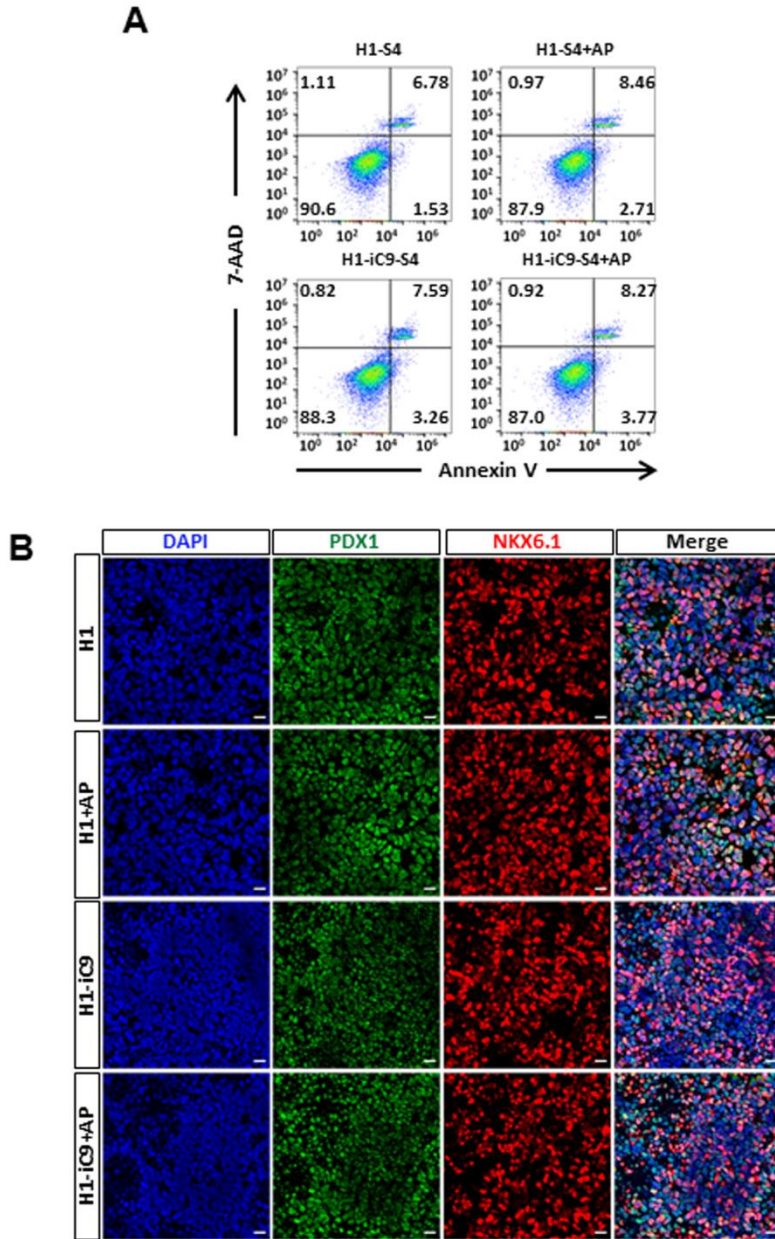

**Figure S8. Viability of stage 4 pancreatic progenitor cells derived from H1 and H1-iC9 is not affected by AP1903 treatment, related to Figure 5.** (A) Analysis of apoptotic cells in stage 4 pancreatic progenitor population derived from either H1 or H1-iC9 cells after overnight treatment with 10 nM AP1903. Result shown is representative of two independent experiments. (B) Representative immunofluorescence staining of PDX1<sup>+</sup> and NKX6.1<sup>+</sup> pancreatic progenitor

cells in the stage 4 population either mock treated or treated with 10 nM AP1903 overnight.

Scale bar = 20  $\mu\text{m}$ .

## Figure S9

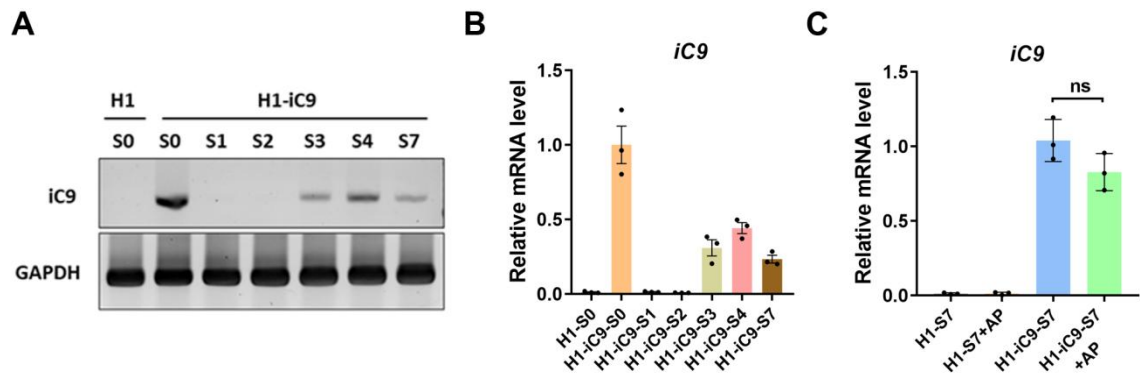

**Figure S9. Transcription of transgene iC9 during beta-like cell differentiation, related to Figure 6.** (A) Semi-quantitative RT-PCR analysis of the SOX2-iC9 fusion transcript in cells at the indicated differentiation stage. (B) Relative expression of the iC9 transgene in the indicated cells. The graph presents mean mRNA levels  $\pm$  s.d. from three independent experiments normalized to the level in H1-iC9-S0 cells. (C) Relative expression of iC9 transgene in the S7 cells derived from H1 or H1-iC9 cells with and without AP1903 treatment, as measured by qRT-PCR (N=3). Data represents the mean  $\pm$  s.d. ns: not statistically significant.

Figure S10

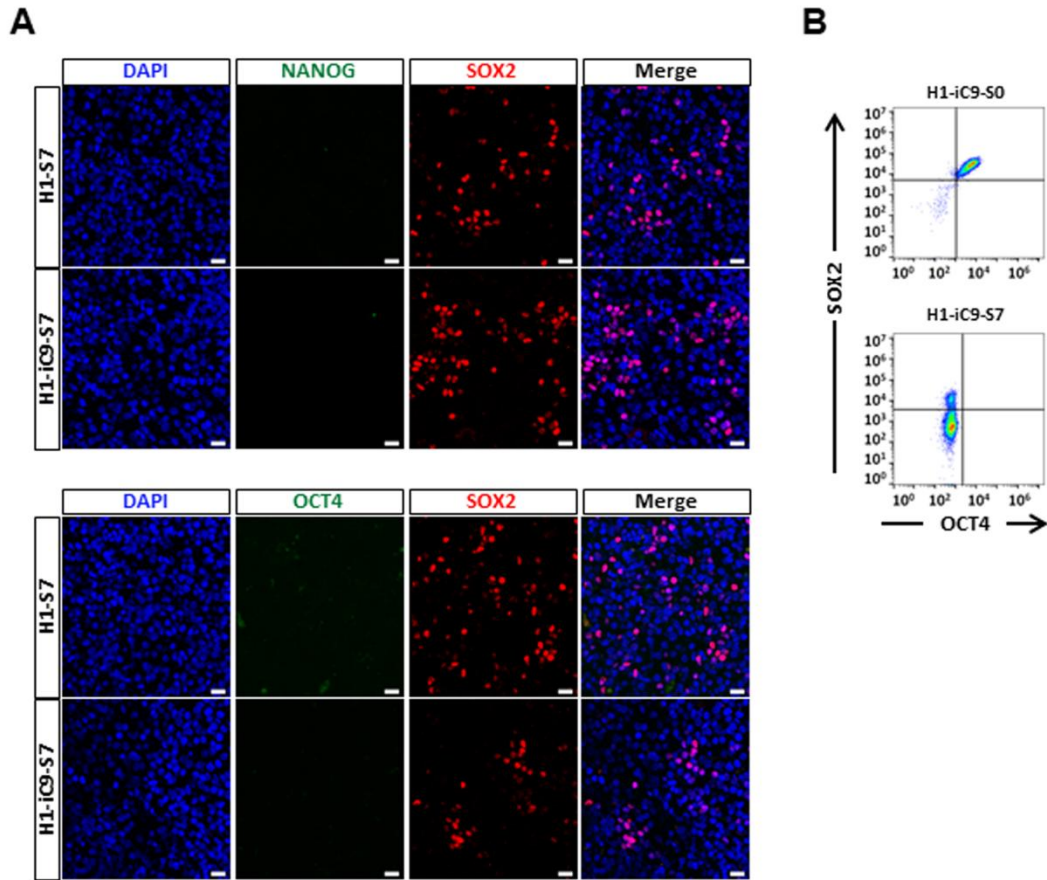

**Figure S10. SOX2<sup>+</sup> cells in the S7 population are not undifferentiated stem cells, related to Figure 6.** (A) Stage 7 cell populations derived from H1 and H1-iC9 differentiation were co-stained with antibodies against NANOG, OCT4, and SOX2 and detected by fluorescence microscopy. Scale bar = 20  $\mu$ m. (B) Flow cytometry analysis of SOX2<sup>+</sup>/OCT4<sup>+</sup> cells in the S0 and S7 populations derived from H1-iC9 cells. Result shown is a representative of two independent experiments.

**Figure S11**

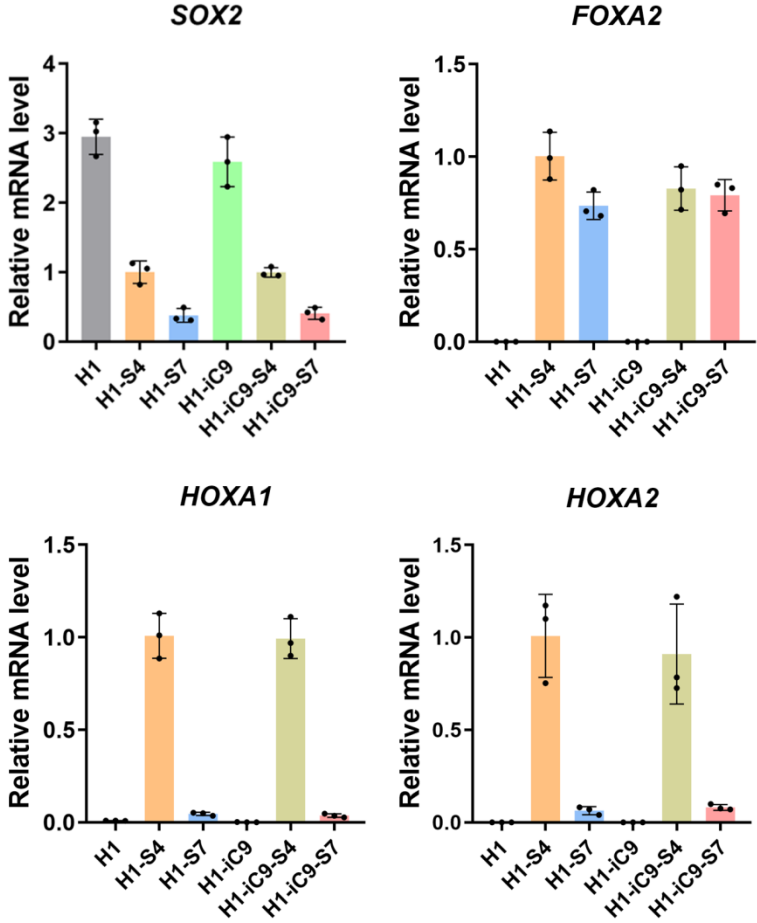

**Figure S11. Relative mRNA level of SOX2, FOXA2, HOXA1 and HOXA2 in the indicated cells, related to Figure 6. Data are presented as the fold change relative to H1-S4 cells (N=3 biological replicates).**

## SUPPLEMENTAL TABLES

**Table S1. Sequencing analysis of predicted off-target sites, related to Figure 1.**

| Genomic location           | CRISPR Target Sequence  | Sequencing results |
|----------------------------|-------------------------|--------------------|
| chr3:181713280 (on target) | CCATTAACGGCACACTGCCCTC  |                    |
| chr8:124301775             | CCATTAACGaCACACTGCCCTC  | WT                 |
| chr12:116042336            | GAGGGGCAGgaTGCCtTTAATGG | WT                 |
| chr14:74269072             | GAGGGGCAGaGTaCCGTgAAAGG | WT                 |
| chr19:44685040             | GAGGGGCAGgGTGCtGTgAAAGG | WT                 |
| chr2:127627389             | GAGGGGCAGTGTGCCGTcccGGG | WT                 |
| chr3:181713318 (on target) | CCGGACAGCGAACTGGAGGGGGG |                    |
| chr3:136862390             | CCCCCCTtCAGTcCGCTGTCCGt | WT                 |
| chr10:49752274             | CCGGgCAGCaAAgTGGAGGGAGG | WT                 |
| chr17:30210703             | CaGGACAGtGAACaGGAGGGAGG | WT                 |
| chr5:443399                | CCGGACcGgGAcCTGGAGGGCGG | WT                 |
| chr6:31781643              | CCACCCTCCAGTcCcCTGTCCcG | WT                 |

**Table S2. Primers used in this study, related to Figure 1-3 and Figure 6.**

### Primers for plasmid construction

| Donor plasmid | PCR Fragments | Primer set                                                                                                   |
|---------------|---------------|--------------------------------------------------------------------------------------------------------------|
| 2A-iC9-Puro   | Left arm      | FP: CCATCGATGAACCAGCGCATGGACAGTTAC<br>RP: GCTCTAGACATGTGTGAGAGGGGCAGTGTGCCGTTAATAGCCGTGCCGG                  |
|               | Right arm     | FP: GCTCTAGAAAAGCTTGGATCCAGAAATTTTCAAAGAAAAACGAGGGAAAAT<br>RP: AAGGAAAAAAGCGGCCGCGCAAGAAGCCTCTCCTTGAAAAATATT |
|               | 2A            | FP: AAGGAAAAAAGCGGCCGCTCTAGACTCGAGGGCAGCGGCCACGAACTTC<br>RP: AGATAGTCTCCACCTGCACTCCAGGACCGGGTTTTCTT          |
|               | FKBP          | FP: ATAAGAATGCGGCCGCAATGGGAGTGCAGGTGGAGACTATCT<br>RP: GTCGACTCCGGATCCACCGCCAGATTCCAGTTTTAGAA                 |



|  |         |                                                                                                    |
|--|---------|----------------------------------------------------------------------------------------------------|
|  | 2A-FKBP | FP: AAGGAAAAAGCGGCCGCTCTAGACTCGAGGGCAGCGGCCACGAACTTC<br>RP: GTCGACTCCGGATCCACCGCCAGATTCCAGTTTTAGAA |
|--|---------|----------------------------------------------------------------------------------------------------|

### Primers for Surveyor assay

| Target Gene | Primer set                                             | Expected PCR product (bp) | Expected cleaved products (bp) |
|-------------|--------------------------------------------------------|---------------------------|--------------------------------|
| SOX2        | FP: TGCAGGACCAGCTGGGCTAC<br>RP: CGTGAGTGTGGATGGGATTGGT | 581                       | 405, 176                       |

### Primers for clone screening

| Target Gene | PCR region                               | Primer set                                                                       |
|-------------|------------------------------------------|----------------------------------------------------------------------------------|
| SOX2        | Left arm junction                        | LA-FP1: GCGGCAATAGCATGGCGA<br>LA-RP1: AGATAGTCTCCACCTGCACTCCCATAGGACCGGGGTTTTCTT |
|             | Right arm junction                       | RA-FP1: GTGTCTCTCACTCGGAAGGACAT<br>RA-RP1: TCTTCTTTTACGTTTGCAACTGTC              |
|             | Monoallelic and biallelic gene insertion | LA-FP2: CCATGGGTTTCGGTGGTCAAGT<br>RA-RP2: CGTGAGTGTGGATGGGATTGGT                 |
|             | Puromycin-resistant gene deletion        | Cre-FP1: TCCTGGTACGTTGAGACCCTGG<br>Cre-RP1: CGTGAGTGTGGATGGGATTGGT               |

### Primers for RT-PCR

| Target Gene            | Primer set                                                     | Expected PCR product size (bp) |
|------------------------|----------------------------------------------------------------|--------------------------------|
| SOX2                   | FP: GGGAAATGGGAGGGGTGCAAAGAGG<br>RP: TTGCGTGAGTGTGGATGGGATTGGT | 151                            |
| SOX2 fusion transcript | FP: CCATGGGTTTCGGTGGTCAAGT<br>RP: CCACATCGAAGACGAGAGTGG        | 621                            |
| OCT4                   | FP: TCGAGAACCGAGTGAGAGG<br>RP: GAACCACACTCGGACCACA             | 125                            |
| NANOG                  | FP: ATGCCTCACACGGAGACTGT<br>RP: AAGTGGGTTGTTTGCCTTTG           | 103                            |
| iC9                    | FP: CAGGAGACGTGGAAGAAAACCCC<br>RP: TAGTGCACCACGCAGGTCTGG       | 109                            |
| FOXA2                  | FP: GGAGCAGCTACTATGCAGAGC<br>RP: CGTGTTTCATGCCGTTTCATCC        | 83                             |
| PAX9                   | FP: GGAGGAGTGTTTCGTGAACGG<br>RP: CGGCTGATGTCACACGGTC           | 98                             |
| HOXA1                  | FP: TCCTGGAATACCCATACTTAGC<br>RP: GCACGACTGGAAAGTTGTAATCC      | 95                             |

|       |                                                        |     |
|-------|--------------------------------------------------------|-----|
| HOXA2 | FP: ACCCCGAAGGGTGGAGATT<br>RP: CGGAGTCCTCAAGGCTTTTACAT | 152 |
| GAPDH | FP: TGCACCACCAACTGCTTAGC<br>RP: GGCATGGACTGTGGTCATGAG  | 87  |

**Table S3. Antibodies for flow cytometry and immunofluorescence staining, related to Figure 2-6.**

**Antibodies for flow cytometry**

| Conjugated antibody                                  | Source                    | Dilution |
|------------------------------------------------------|---------------------------|----------|
| FITC Mouse anti-CD45                                 | BioLegend                 | 1:40     |
| Alexa Fluor 647 Mouse anti-SOX2                      | BD Biosciences            | 1:40     |
| PE Mouse anti-Oct3/4                                 | BD Biosciences            | 1:10     |
| Alexa Fluor 647 Mouse anti-NKX6.1                    | BD Biosciences            | 1:40     |
| PE Rabbit anti-Insulin                               | Cell Signaling Technology | 1:100    |
| Alexa Fluor 647 Mouse IgG1, $\kappa$ isotype control | BD Biosciences            | 1:40     |
| PE Mouse IgG1, $\kappa$ Isotype Control              | BD Biosciences            | 1:10     |
| PE Rabbit IgG1 XP isotype control                    | Cell Signaling Technology | 1:100    |

**Antibodies for immunofluorescence staining**

| Primary antibodies   |                 |                           |          |
|----------------------|-----------------|---------------------------|----------|
| Antigen              | Species         | Source                    | Dilution |
| Nestin               | Rabbit          | EMD Millipore             | 1:500    |
| NANOG                | Mouse           | BD Biosciences            | 1:500    |
| OCT4                 | Rabbit          | Stemgent                  | 1:500    |
| SOX2                 | Rabbit          | Novus Biology             | 1:250    |
| SOX2                 | Goat            | R&D System                | 1:100    |
| TUJ1                 | Rabbit          | Covance                   | 1:1000   |
| PDX1                 | Rabbit          | Abcam                     | 1:500    |
| NKX6.1               | Mouse           | BCBC #2023                | 1:500    |
| MAFA                 | Rabbit          | Abcam                     | 1:500    |
| Insulin              | Guinea Pig      | Dakocytomation            | 1:1000   |
| GFP                  | Chicken         | Abcam                     | 1:2000   |
| HA                   | Rabbit          | Cell Signaling Technology | 1:800    |
| FOXA2                | Goat            | R&D System                | 1:25     |
| Secondary antibodies |                 |                           |          |
| Antigen              | Conjugation     | Source                    | Dilution |
| Rabbit/Mouse/Chicken | Alexa Fluor 488 | Jackson ImmunoResearch    | 1:1000   |

|                  |     |                        |        |
|------------------|-----|------------------------|--------|
| Goat/Rabbit      | Cy3 | Jackson ImmunoResearch | 1:2000 |
| Guinea Pig/Sheep | Cy5 | Jackson ImmunoResearch | 1:500  |

**Table S4. Protocol for H1 differentiation into stage 7 beta-like cells, related to Figure 5.**

| Stage   | Day       | Basic medium                                                                       | Factors                                                                                                                                                                                                                   |
|---------|-----------|------------------------------------------------------------------------------------|---------------------------------------------------------------------------------------------------------------------------------------------------------------------------------------------------------------------------|
| Stage 1 | Day 1     | MCDB 131<br>1x Glutamax<br>10 mM Glucose<br>1.5 g/L Sodium bicarbonate<br>0.5% BSA | 100 ng/mL GDF8 (PeproTech)<br>3 $\mu$ M CHIR99021 (SellechChem)                                                                                                                                                           |
|         | Day 2     | MCDB 131<br>1x Glutamax<br>10 mM Glucose<br>1.5 g/L Sodium bicarbonate<br>0.5% BSA | 100 ng/mL GDF8<br>0.3 $\mu$ M CHIR99021                                                                                                                                                                                   |
|         | Day3      | MCDB 131<br>1x Glutamax<br>10 mM Glucose<br>1.5 g/L Sodium bicarbonate<br>0.5% BSA | 100 ng/mL GDF8                                                                                                                                                                                                            |
| Stage 2 | Day4-5    | MCDB 131<br>1x Glutamax<br>10 mM Glucose<br>1.5 g/L Sodium bicarbonate<br>0.5% BSA | 50 ng/mL FGF7 (PeproTech)<br>0.25 mM ascorbic acid (Sigma)                                                                                                                                                                |
| Stage 3 | Day 6-7   | MCDB 131<br>1x Glutamax<br>10 mM Glucose<br>2.5 g/L Sodium bicarbonate<br>2% BSA   | 50 ng/mL FGF7<br>0.25 mM ascorbic acid<br>0.25 $\mu$ M SANT-1 (Sigma)<br>1 $\mu$ M retinoic acid (Sigma)<br>100 nM LDN193189 (Stemgent)<br>1:200 ITS-X (Life technologies)<br>200 nM TPB (Millipore)                      |
| Stage 4 | Day 8-10  | MCDB 131<br>1x Glutamax<br>10 mM Glucose<br>2.5 g/L Sodium bicarbonate<br>2% BSA   | 2 ng/mL FGF7<br>0.25 mM ascorbic acid<br>0.25 $\mu$ M SANT-1<br>0.1 $\mu$ M retinoic acid<br>200 nM LDN193189<br>1:200 ITS-X<br>100 nM TPB                                                                                |
| Stage 5 | Day 11-13 | MCDB 131<br>1x Glutamax<br>20 mM Glucose<br>1.5 g/L Sodium bicarbonate<br>2% BSA   | 0.25 $\mu$ M SANT-1<br>0.05 $\mu$ M retinoic acid<br>100 nM LDN193189<br>1:200 ITS-X<br>1 $\mu$ M T3 (Sigma)<br>10 $\mu$ M ALK5i (Enzo Life Sciences)<br>10 $\mu$ M zinc sulfate (Sigma)<br>10 $\mu$ g/mL heparin (Sigma) |
| Stage 6 | Day 14-20 | MCDB 131<br>1x Glutamax<br>20 mM Glucose<br>1.5 g/L Sodium bicarbonate             | 100 nM LDN193189<br>1:200 ITS-X<br>1 $\mu$ M T3<br>10 $\mu$ M ALK5i                                                                                                                                                       |

|         |           |                                                                                  |                                                                                                                                                                                                            |
|---------|-----------|----------------------------------------------------------------------------------|------------------------------------------------------------------------------------------------------------------------------------------------------------------------------------------------------------|
|         |           | 2% BSA                                                                           | 10 $\mu$ M zinc sulfate<br>100 nM Gs inh XX (EMD Millipore)<br>10 $\mu$ g/mL heparin                                                                                                                       |
| Stage 7 | Day 21-27 | MCDB 131<br>1x Glutamax<br>20 mM Glucose<br>1.5 g/L Sodium bicarbonate<br>2% BSA | 1:200 ITS-X<br>1 $\mu$ M T3<br>10 $\mu$ M ALK5i<br>10 $\mu$ M zinc sulfate<br>1 mM N-acetyl cysteine (Sigma)<br>10 $\mu$ M Trolox (EMD Millipore)<br>2 $\mu$ M R428 (SelleckChem)<br>10 $\mu$ g/mL heparin |

## TRANSPARENT METHODS

### Plasmid construction

Cas9(phCas9) (Mali et al., 2013) and Cas9 D10A (phCas9-D10A) (Mali et al., 2013) expression plasmids were purchased from Addgene (Cambridge, MA). The CRISPR plasmid, pU6-CRISPR, containing the U6 promoter and the gene for the single-guide RNA (sgRNA) was generated as previously described (Wang et al., 2015). To generate the donor plasmid for in-frame insertion of the *iC9* gene into the *SOX2* locus, left and right homology arms sequences (~0.5 kb of each) spanning the stop codon of the *SOX2* gene were PCR amplified from the genomic DNA of H1 cells and cloned into pBluescript SK(-) to generate pBS-SOX2-HA. The 1.3 kb *2A-iC9* gene was constructed by in-frame fusion of the PCR amplified *iC9* gene in pMSCV-F-del Casp9. IRES.GFP (Addgene) (Straathof et al., 2005) with a 57-bp synthetic fragment encoding the 2A peptide. The *2A-iC9* cassette was then cloned into pBluescript SK(-) to generate pBS-2A-iC9. To construct the donor plasmid, pBS-SOX2-HA was linearized by Xba1 and BamH1 double digestion. A 1.3 kb fragment containing the *2A-iC9* gene was isolated from pBS-2A-iC9 by Xba1 and Kpn1 double digestion. A 1.6 kb fragment containing the pgk-Puro fragment flanked by loxP recognition sites was isolated from ppgk-Puro by Kpn1 and BamH1 digestion. The three fragments were ligated to generate pSOX2-iC9-donor. All primers used for plasmid construction are listed in Table S2.

## DNA transfection

HEK293T cells were cultured in DMEM (Lonza, Allendale, NJ) supplemented with 10% fetal bovine serum (HyClone, Logan, UT), 100 U/mL penicillin, and 100 mg/mL streptomycin. Cells were passaged twice a week at 37°C under 5% CO<sub>2</sub>. For the Surveyor assay, HEK293T cells cultured in 48-well plates were transfected at 40% confluency using Lipofectamine 3000 (Life Technologies) together with 67 ng pU6-CRISPR and 200 ng of Cas9 or Cas9 D10A expression plasmid. Forty-eight hours after transfection, genomic DNA was isolated with Epicentre QuickExtract solution (Epicentre Biotechnologies, Madison, WI) and used for the Surveyor assay. Human ES cell line H1 (WA01) was purchased from WiCell Research Institute (Madison, WI). The cells were cultured in mTeSR1 medium (StemCell Technologies, Vancouver, BC) on plates coated with Matrigel (BD Bioscience, San Jose, CA). Cells were passaged with ReLeSR (STEMCELL Technologies) every 4-6 days with 1:6~1:12 dilutions. For DNA transfection, H1 cells pretreated overnight with Rho kinase (ROCK)-inhibitor Y-27632 (Stemgent, Beltsville, MD) were dissociated into single cells using Accutase (STEMCELL Technologies). Nucleofection was carried out using 4D Amaxa P3 Primary Cell 4-D Nucleofector system (Lonza). Approximately  $8 \times 10^5$  cells were nucleofected using program CA-137. To insert the *iC9* gene into the *SOX2* locus in H1 cells, 1.5 µg pSOX2-*iC9*-donor was nucleofected with 0.65 µg pU6-sgRNA1, 0.65 µg pU6-sgRNA2, and 2 µg pCas9 D10A. Two days after nucleofection, single cells were prepared and plated in mTeSR1 medium containing 0.5 µg/mL puromycin. Puromycin-resistant colonies were picked after two weeks of selection and genotyped with genomic PCR using primers listed in Table S2. To delete the pgk-Puro cassette, 4 µg pBS185 (Sauer, 1993) and 1 µg pmax-GFP<sup>TM</sup> (Lonza) were introduced into cells by nucleofection. FACS sorted GFP<sup>+</sup> cells were plated and individual colonies picked after two weeks. Genomic PCR was performed to verify the deletion of the puromycin cassette. PCR primers used for genotyping the clones are listed in Table S2.

### **Surveyor assay**

To carry out the Surveyor assay, the genomic DNA spanning the CRISPR cleavage site was PCR amplified with Hotstar Taq (Qiagen, Germantown, MD), and the PCR product was subjected to denaturation and reannealing with the following conditions: 95°C for 10 min, 95°C to 85°C ramping at  $-2^{\circ}\text{C}/\text{s}$ , 85°C to 25°C ramping at  $-0.25^{\circ}\text{C}/\text{s}$ , and 25°C for 1 min. PCR primers for DNA amplification are listed in Table S2. Three microliter of re-annealed DNA in a 12  $\mu\text{L}$  reaction was mixed with 1  $\mu\text{L}$  of Surveyor Nuclease S (Integrated DNA Technologies, Skokie, IL), 1  $\mu\text{L}$  of Surveyor Enhancer S, and 1.2  $\mu\text{L}$  of 0.15 M  $\text{MgCl}_2$  and incubated at 42°C for 1 h. The digested product was analyzed on a 2% agarose gel and imaged with a ChemiDoc imaging System (Bio-Rad Laboratories, Hercules, CA). The percentage of indel formation was calculated by the following formula: % indel formation =  $100 \times [1 - (1 - \text{fraction cleaved})^{1/2}]$ ; fraction cleaved =  $100 \times \text{sum of the cleavage product peak} / \text{cleavage product} + \text{parent peak}$ .

### **Lentiviral production and transduction**

To generate the lentiviral vector HIV7/PGK-GFP, approximately  $2 \times 10^6$  HEK293T cells were cotransfected with 12  $\mu\text{g}$  pHIV7/PGK-GFP, 12  $\mu\text{g}$  pCgp, 4  $\mu\text{g}$  pRev-2, and 2  $\mu\text{g}$  pCMV-G (Lo et al., 2007) using calcium phosphate coprecipitation. Infectious virus was harvested 48 h later and tittered on HT1080 cells with different dilutions in the presence of 4  $\mu\text{g}/\text{mL}$  polybrene. FACS analysis was carried out 48 h after transduction to determine the fraction of GFP<sup>+</sup> cells.

### **Cytogenetic Analysis**

ES cells at ~80% confluence in mTesR culture medium were processed for preparation of metaphase chromosome spreads according to standard cytogenetic protocols (Barch and Association of Cytogenetic Technologists., 1991). Following DAPI staining, metaphase chromosome spreads were observed and counted under a fluorescence microscope. Twenty metaphases were analyzed for each cell line.

### **Cell viability assay**

H1, H1-iC9-pur and H1-iC9 cells were seeded in 96-well plate at a density of  $10^4$  cells /well in the absence or in the presence of varying concentrations of AP1903 overnight. Cell viability was determined by MTS assay using a CellTiter 96<sup>®</sup> AQueous One Solution kit (Promega, Madison, MI) according to the manufacturer's instructions.

### **Apoptosis assay**

Apoptosis assay was performed after overnight incubation of cells with 10 nM AP1903. To block Caspase activity, the pan Caspase inhibitor qVD-OPh (20  $\mu$ mol/l, ApexBio Technology, Boston, MA) was added together with AP1903. The percentage of apoptotic cells after overnight incubation was measured by staining the cells with Annexin V-PE and 7-amino actinomycin D (7-AAD) following the manufacturer's instruction (BD Pharmingen, San Jose, CA) and analyzed by flow cytometry. Annexin V<sup>+</sup>/7-AAD<sup>-</sup> and Annexin V<sup>+</sup>/7-AAD<sup>+</sup> cells represent early and late apoptotic cells, respectively.

### **Teratoma formation**

The stable H1-iC9(GFP) line was established by the transduction of H1-iC9 cells with HIV7/C-GFP at a multiplicity of infection of 2. GFP<sup>+</sup> cells were isolated and pooled by cell sorting 48 h after transduction. To induce teratoma, cells were dissociated with Accutase and resuspended in mTeSR1 medium containing 10  $\mu$ M Y-27632. Approximately  $2 \times 10^6$  cells in 50  $\mu$ L medium were mixed with 50  $\mu$ L cold Matrigel (BD Pharmingen) and injected subcutaneously into the lateral flank of 8-12 week old NOD scid gamma (NSG) mice. Teratomas were harvested 4-6 weeks after cell injection, fixed in 10% neutralized formalin for 24 h, embedded in paraffin, and

sectioned for hematoxylin-eosin (H&E) staining. Animal studies were carried out in accordance with protocols approved by the City of Hope Institutional Animal Care and Use Committee.

### **Semi-quantitative RT-PCR and real-time RT-PCR**

Total RNA was isolated using the RNeasy mini kit (Qiagen) following the manufacturer's instructions. The purity and concentration of RNA were determined using a Nanodrop spectrophotometer (NanoDrop Technologies, Wilmington, DE). Total RNA (1 µg) was reverse transcribed into cDNA using SuperScript VILO MasterMix (Life Technologies). For semi-quantitative PCR, 5 µL diluted cDNA (1:25) was amplified using HotStar Taq polymerase. The products were separated on a 2% agarose gel and imaged with ChemiDoc imaging System. Real-time RT-PCR was carried out in the CFX96 Touch™ Real-time PCR Detection System (Bio-Rad) using SYBR Green Supermix (Bio-Rad). Primers used for RT-PCR are listed in Table S2.

### **Flow cytometry analysis**

To detect CD45<sup>+</sup> hematopoietic cells, both H1- and H1-iC9-derived hematopoietic cell populations were suspended in flow cytometry staining buffer (Thermo Fisher Scientific, Irwindale, CA). FITC-conjugated anti-human CD45 antibody (Biolegend, San Diego, CA) at a 1:40 dilution was added and the mixture incubated for 30 min at room temperature. For the staining of intracellular antigens, cells in suspension were fixed and permeabilized using Foxp3 transcription factor staining kit (Thermo Fisher Scientific). After washing with permeabilization buffer, cells were stained with directly conjugated antibodies. Antibodies and dilutions used for FACS are listed in Table S3. The data for FACS was collected using an Accuri C6 flow Cytometer (BD Biosciences) and analyzed with the FlowJo software.



## **Immunofluorescence staining**

For cell immunofluorescence staining, monolayer cultures were fixed in 4% paraformaldehyde for 15 min at room temperature and washed with PBS three times, followed by incubation for 1 h in blocking solution containing 5% BSA and 0.3% Triton X-100 in PBS. Primary and secondary antibodies were diluted with 1% BSA and 0.15% Triton X-100 in PBS. Cells were incubated with primary antibodies at 4°C overnight. After three washes with PBS, cells were incubated with fluorescence-conjugated secondary antibodies for 1 h at room temperature. After three washes with PBS, the cell-containing slide was mounted with mounting reagent and stained with DAPI (Vector Laboratories, Burlingame, CA). Images were captured using a Zeiss Axio Imager microscope (Carl Zeiss, San Diego, CA). For the staining of H1- and H1-iC9-derived beta-like cells, cell clusters in S7 were removed from air-liquid interface, washed with PBS, and fixed in 4% paraformaldehyde solution at 4°C for 1 h. After three washes with PBS, cell clusters were incubated in 30% sucrose at 4°C overnight, embedded in OCT compound (Sakura, Torrance, CA), and frozen in dry ice. Sections (5 µm thickness) were prepared using a cryostat (Leica, Allendale, NJ). Slides were washed with PBS to remove OCT compound followed by incubation with blocking solution and stained with primary and secondary antibodies as described above. For paraffin-embedded teratoma staining, sections were deparaffinized in Clearify™ (American MasterTech, Lodi, CA), rehydrated with a gradient of ethanol, and underwent antigen retrieval in citrate buffer (PH 6.0) before blocking and antibody staining. Primary and secondary antibodies are listed in Table S3.

## **Western blot**

Harvested cells were lysed using RIPA buffer (Thermo Fisher Scientific) containing HALT™ Protease Inhibitor Cocktail (Thermo Fisher Scientific). The cell lysates were mixed with 4xNuPAGE LDS sample buffer (Invitrogen, Carlsbad, CA) and loaded onto a NuPAGE 4–12%

Bis-Tris gel (Invitrogen) for protein separation. Proteins were transferred to polyvinylidene fluoride (PVDF) membranes (Bio-Rad) and blocked for 1 h with 5% BSA and 0.05% Tween in PBS followed by the incubation with a BCL-2 (50E3) rabbit antibody (1:1000, Cell Signaling Technology, Danvers, MA) or a mouse GAPDH antibody (1:2000, GeneTex, Irvine, CA) diluted with blocking solution at 4°C overnight. Membranes were washed with PBS and incubated with HRP-conjugated secondary antibodies (Thermo Fisher Scientific) at room temperature for 1 h and developed using Pierce ECL substrate (Thermo Fisher Scientific).

### **Hematopoietic cell differentiation**

Undifferentiated human H1 cells or H1-iC9 cells were induced to differentiate into CD45<sup>+</sup> cells as previously described (Senju et al., 2011). Briefly, undifferentiated cells were transferred onto OP9 feeder layers and cultured with  $\alpha$ -Minimal Essential Medium (Hyclone) supplemented with 20% fetal calf serum. After 18 days, cells were detached with dissociation solution containing 0.25% trypsin, 0.1% collagenase type IV (Sigma), and 0.1% DNase I (Sigma) in PBS. Cells were passed through 100  $\mu$ m cell strainers (Corning, Corning, NY) to yield a single-cell suspension, followed by culturing the cell suspension in  $\alpha$ - Minimal Essential Medium containing 100 ng/mL GM-CSF and 50 ng/mL M-CSF (PeproTech, Rocky Hill, NJ) for 14 days.

### **Neuronal cell differentiation**

Approximately  $3 \times 10^6$  Accutase-dissociated single cells were suspended in 1ml neural induction medium consisting of STEMdiff™ Neural Induction Medium and SMADi Neural Induction Supplement (STEMCELL Technologies). Embryoid bodies (EBs) were harvested with 37  $\mu$ m Reversible Strainers 5 days later followed by seeding into plates coated with Poly-L-ornithine (PLO) and laminin (Sigma) in STEMdiff™ Dopaminergic Neuron Differentiation Medium (STEMCELL Technologies). Neuronal rosettes that emerged were selectively removed with STEMdiff™ Neural Rosette Selector Reagent (STEMCELL Technologies) after 6 days in

culture. Rosettes were then replated into a new PLO/laminin-coated well and expanded for additional 7 days in STEMdiff™ Dopaminergic Neuron Differentiation Medium to generate neuronal precursors. Neuron precursors were frozen in culture medium supplemented with 10% DMSO. To generate neurons, frozen neuronal precursors were thawed and expanded for additional 7 days. The cells were then dissociated with Accutase and plated into PLO/laminin-coated 24-well plates at a density of  $4\text{--}6 \times 10^5/\text{cm}^2$  in STEMdiff™ Dopaminergic Neuron Maturation Medium 1 (STEMCELL Technologies) for 2 days. AP1903 was added on the third day after the initiation of the maturation process. SOX2 expression was then examined 2 days after AP1903 treatment.

### **Beta-like cell differentiation**

Human beta-like cells were differentiated from H1 and H1-iC9 cells using a seven-stage differentiation protocol reported by Rezanian *et al.* (Rezanian et al., 2014). Before differentiation, approximately  $1.3\text{--}1.5 \times 10^5$  cells/cm<sup>2</sup> undifferentiated cells were seeded into Matrigel-coated plates in mTeSR medium supplemented with 10μM Y27632. After 48 h, cell differentiation was initiated by replacing the culture media with MCDB 131 media (Corning) supplemented with Glutamax (Life Technologies), fatty acid-free BSA (Proliant Biologicals, Boone, IA), and a cocktail of molecules described in Table S4 with fresh media change every day. Cells were cultured in monolayer during the first four stages of differentiation to generate pancreatic progenitor cells in stage 4. The stage 4 cells were dissociated with TrypLE Express Enzyme (Life Technologies) and resuspended in stage 5 media at a density of  $5 \times 10^7/\text{mL}$ . Approximately 10 μL cell drops containing  $5 \times 10^5$  cells were spotted onto a filter insert (Corning) floating in 1.5 ml stage 5 differentiation media. Cells cultured in this air-liquid interface were allowed to differentiate into stage 7 with media change every day. Cell clusters were removed from the insert for analysis between 28–35 days after the initiation of differentiation.

## Statistical analysis

Results are presented as mean  $\pm$  standard deviation (s.d.). Statistical significance between groups was calculated using one-way ANOVA followed with Turkey's correction. \* $P < 0.05$ , \*\* $P < 0.01$ , \*\*\* $P < 0.001$ , \*\*\*\* $P < 0.0001$ , ns: P value not significant. Statistic calculations were conducted using GraphPad Prism 7 software (GraphPad Software, San Diego, CA). The number of independent experiments was indicated in figure legends.

## SUPPLEMENTAL REFERENCES

Barch, M.J., and Association of Cytogenetic Technologists. (1991). The ACT cytogenetics laboratory manual, 2nd edn (New York: Raven Press).

Lo, H.L., Chang, T., Yam, P., Marcovecchio, P.M., Li, S., Zaia, J.A., and Yee, J.K. (2007). Inhibition of HIV-1 replication with designed miRNAs expressed from RNA polymerase II promoters. *Gene Ther* 14, 1503-1512.

Mali, P., Yang, L., Esvelt, K.M., Aach, J., Guell, M., DiCarlo, J.E., Norville, J.E., and Church, G.M. (2013). RNA-guided human genome engineering via Cas9. *Science* 339, 823-826.

Rezania, A., Bruin, J.E., Arora, P., Rubin, A., Batushansky, I., Asadi, A., O'Dwyer, S., Quiskamp, N., Mojibian, M., Albrecht, T., *et al.* (2014). Reversal of diabetes with insulin-producing cells derived in vitro from human pluripotent stem cells. *Nature biotechnology* 32, 1121-1133.

Sauer, B. (1993). Manipulation of transgenes by site-specific recombination: use of Cre recombinase. *Methods Enzymol* 225, 890-900.

Senju, S., Haruta, M., Matsumura, K., Matsunaga, Y., Fukushima, S., Ikeda, T., Takamatsu, K., Irie, A., and Nishimura, Y. (2011). Generation of dendritic cells and macrophages from human induced pluripotent stem cells aiming at cell therapy. *Gene Ther* 18, 874-883.

Straathof, K.C., Pule, M.A., Yotnda, P., Dotti, G., Vanin, E.F., Brenner, M.K., Heslop, H.E., Spencer, D.M., and Rooney, C.M. (2005). An inducible caspase 9 safety switch for T-cell therapy. *Blood* 105, 4247-4254.

Wang, X., Wang, Y., Wu, X., Wang, J., Wang, Y., Qiu, Z., Chang, T., Huang, H., Lin, R.J., and Yee, J.K. (2015). Unbiased detection of off-target cleavage by CRISPR-Cas9 and TALENs using integrase-defective lentiviral vectors. *Nature biotechnology* 33, 175-178.
